# Supplementary material for: Role of Socioeconomic Status in Hypertension among Chinese Middle-Aged and Elderly Individuals
Source: Hindawi journal article supplement (doi:10.1155/2019/6956023), 2019-10-13
Supplement: f1 [file 6956023.f1.pdf]

Supplementary Table S1 SES factors

| Variables                         | Assignment                                                                                            |
|-----------------------------------|-------------------------------------------------------------------------------------------------------|
| Dependent variable                |                                                                                                       |
| Hypertension                      | 0=No, 1=Yes                                                                                           |
| Independent variable              |                                                                                                       |
| <b>Demographic factors</b>        |                                                                                                       |
| Sex                               | 0=Male, 1=Female                                                                                      |
| Age                               | 45~, 55~, 65~, 75~                                                                                    |
| Residence                         | 0=Urban, 1=Rural                                                                                      |
| <b>Economic factors</b>           |                                                                                                       |
| Education level                   | 0= Illiteracy, 1= Primary school, 2=Junior high school, 3= Senior high school, 4=University or higher |
| Income                            | 1=Lowest<br>2=Lower<br>3=Medium<br>4=Higher<br>5=Highest                                              |
| Working status                    | 0=Working, 1=Retirement, 2= Unemployment                                                              |
| Medical insurance                 | 0=No, 1=Yes                                                                                           |
| <b>Health and health behavior</b> |                                                                                                       |
| BMI                               | 0= Underweight (<18.5), 1=Normal (18.5~23.9),<br>2= Overweight ( $\geq 24$ )                          |
| Exercise                          | 0=Low intensity, 1=Medium, 2= High intensity                                                          |
| Smoking                           | 0=No, 1=Yes                                                                                           |
| Diabetes                          | 0=No, 1=Yes                                                                                           |
| <b>Psychosocial factors</b>       |                                                                                                       |
| Depression                        | 0=No, 1=Yes                                                                                           |
| Social support                    | 1=Lowest<br>2=Lower<br>3=Medium<br>4=Higher<br>5=Highest                                              |
| Social participation              | 0=No, 1=Yes                                                                                           |
